# Supplementary material
Source: Research Square preprint supplement (doi:10.21203/rs.3.rs-9269792/v1)
Supplement: Supplementary file 1 [file 38ab69077eecbd77e2b5679f.docx]

# **Supplementary Table 3.** Round 1 results.

| **Statement** | **Level of aggregation** | | | | | **Result** | **Notes** |
| --- | --- | --- | --- | --- | --- | --- | --- |
| **Area 1 - Treatment of potential triggers of AFib in septic shock patient** | **% 7 - 9** | **% 4 - 6** | **% 1 - 3** | **% 4 - 9** | **% 1 - 6** |  |  |
| 1. At first presentation of septic shock patient, is key important to identify all triggers of AFib before starting any treatments to control HR [1,2,3,4,5,6,7,8]. | 100.0% | 0.0% | 0.0% | 100.0% | 0.0% | AGREEMENT |  |
| 2. At first presentation of septic shock patient, hypovolemia should be identified and corrected before starting controlling HR [1,2,3,4,5,6,7,8]. | 100.0% | 0.0% | 0.0% | 100.0% | 0.0% | AGREEMENT |  |
| 3. At first presentation of septic shock patient, withdrawal of beta-blockers should be identified as potential trigger [1,2,3,4,5,6,7,8]. | 85.7% | 0.0% | 14.3% | 85.7% | 14.3% | AGREEMENT |  |
| 4. At first presentation of septic shock patient, pain or anxiety (e.g. postoperative) should be detected before starting controlling HR [1,2,3,4,5,6,7,8]. | 71.4% | 14.3% | 14.3% | 85.7% | 28.6% | DISAGREEMENT AND REWORDED | The publication [44] was added. The statement was be reworded as:    “At first presentation of septic shock patient with AFib, pain or anxiety (e.g. postoperative) should be detected before starting controlling HR” [1,2,3,4,5,6,7,8,44]. |
| 5. At first presentation of septic shock patient, hypokalaemia should be identified and corrected before starting controlling HR [1,2,3,4,5,6,7,8]. | 85.7% | 0.0% | 14.3% | 85.7% | 14.3% | AGREEMENT |  |
| 6. At first presentation of septic shock patient, hypomagnesemia should be identified and corrected before starting controlling HR [1,2,3,4,5,6,7,8,9]. | 71.4% | 14.3% | 14.3% | 85.7% | 28.6% | DISAGREEMENT AND REWORDED | This statement was reworded as:  “At first presentation of septic shock patient with AFib, suspected hypomagnesemia may be identified and corrected before starting controlling HR with landiolol, but without delaying in case of hemodynamic instability”  [1,2, 3,4,5,6,7,8,9]. |
| 7. At first presentation of septic shock patient, use of catecholamine (vasopressors, inotrope) should be detected and discontinued before starting controlling HR [1,2,3,4,5,6,7,8]. | 0.0% | 42.9% | 57.1% | 42.9% | 100.0% | DISAGREEMENT AND REWORDED | This statement was reworded as:  “In case of AFib in stabilised septic shock patient, doses of catecholamine (vasopressors, inotrope) should be revaluated and non-catecholamine vasopressors (e.g. vasopressin) may be considered as it allows to decrease catecholamine doses and HR along with contemplating starting controlling HR” [1,2,3,4,5,6,7,8]. |
| 8. At first presentation of septic shock patient, high fever should be detected and treated before starting controlling HR [1,2,3,4,5,6,7,8]. | 71.4% | 0.0% | 28.6% | 71.4% | 28.6% | DISAGREEMENT AND REWORDED | The publication [45] was added. The statement was be reworded as:  “At first presentation of septic shock patient with Afib, high fever should be detected and could be treated before starting controlling HR but without delaying in case of hemodynamic instability” [1,2,3,4,5,6,7,8,45]. |
| 9. At first presentation of septic shock patient, fluid overload should be identified and corrected before starting controlling HR [1,2,3,4,5,6,7,8]. | 42.9% | 14.3% | 42.9% | 57.1% | 57.1% | DISAGREEMENT AND EXCLUDED |  |
| 10. At first presentation of septic shock patient, severe anaemia should be identified and corrected before starting controlling HR [1,2,3,4,5,6,7,8]. | 71.4% | 0.0% | 28.6% | 71.4% | 28.6% | DISAGREEMENT AND REWORDED | The statement was reworded as:  “At first presentation of septic shock patient with AFib, severe anaemia and in absence of hypovolemia should be identified, and its management should be initiated along with starting controlling HR, and without delay in case of hemodynamic instability”  [1,2, 3,4,5,6,7,8]. |
| 11. At first presentation of septic shock patient, myocardial ischemia should be detected and treated before starting controlling HR [1,2,3,4,5,6,7,8]. | 71.4% | 0.0% | 28.6% | 71.4% | 28.6% | DISAGREEMENT AND REWORDED | This statement was reworded as:  “At first presentation of septic shock patient with AFib, myocardial ischemia should be detected and treated, but HR control should not be delayed as tachycardia contributes to increase DO2/VO2 imbalance and induce further critical ischemia” [1,2,3,4,5,6,7,8]. |
| 12. At first presentation of septic shock patient, endocrine disorders (pheochromocytoma or elevated thyroid hormones) should be detected in the context of HR control to further adjust patient management [1,2,3,4,5,6,7,8]. | 71.4% | 14.3% | 14.3% | 85.7% | 28.6% | DISAGREEMENT AND REWORDED | This statement was reworded as:  “Endocrine disorders (pheochromocytoma or elevated thyroid hormones) should be investigated in the context of HR control as a potential trigger to further adjust patient management” [1,2,3,4,5,6,7,8]. |
| 13. At first presentation of septic shock patient, severe hypothermia should be identified and corrected before starting controlling HR [1,2,3,4,5,6,7,8]. | 85.7% | 14.3% | 0.0% | 100.0% | 14.3% | AGREEMENT |  |
|  | | | | | | |  |
| **Area 2 - Hemodynamic assessment in septic shock patient before HR control** | **% 7 - 9** | **% 4 - 6** | **% 1 - 3** | **% 4 - 9** | **% 1 - 6** |  |  |
| 14. Determination of hemodynamic parameters with continuous HR and BP is the minimum mandatory to control patient response/condition with arterial catheter / central catheter [5,8,10]. | 71.4% | 14.3% | 14.3% | 85.7% | 28.6% | DISAGREEMENT AND REWORDED | This statement was reworded as:  “Determination of hemodynamic parameters with continuous HR and BP is the minimum requirement to control patient response/condition, and advanced monitoring for cardiac assessment is recommended” [5,8,10]. |
| 15. Clinical monitoring of tissue perfusion is important when reducing HR rate (the more HR is reduced the tighter the control of tissue perfusion has to be checked: lactate, capillary refill time test, ScvO2 and /or Delta pCO2) [5,8,10]. | 100.0% | 0.0% | 0.0% | 100.0% | 0.0% | AGREEMENT |  |
| 16. Invasive and/or non-invasive tools can be used to assess hemodynamic profile [5,8,10,11]. | 85.7% | 0.0% | 14.3% | 85.7% | 14.3% | AGREEMENT |  |
|  | | | | | | |  |
| **Area 3 - Individualised cardioversion approach to AFib in critically ill patients** | **% 7 - 9** | **% 4 - 6** | **% 1 - 3** | **% 4 - 9** | **% 1 - 6** |  |  |
| 17. If there is hemodynamic instability, cardioversion is the appropriate procedure to apply [1,12]. | 100.0% | 0.0% | 0.0% | 100.0% | 0.0% | AGREEMENT |  |
| 18. A “crushing” patient can be easily identified on the basis of very low blood pressure, no response to fluids, potential bradycardia, fainting, dizziness, lethargy, confusion, low urine output, cold skin, mottling [5,8]. | 100.0% | 0.0% | 0.0% | 100.0% | 0.0% | AGREEMENT |  |
| 19. Unlike CCU/CICU, in Critical Care setting, up to 70% of patients can relapse after EC [13,14]. | 85.7% | 0.0% | 14.3% | 85.7% | 14.3% | AGREEMENT |  |
| 20. If electric cardioversion is not effective, amiodarone can be an option in selected patients who are haemodynamically unstable or with severely impaired LVEF [8,15,16]. | 71.4% | 14.3% | 14.3% | 85.7% | 28.6% | DISAGREEMENT AND REWORDED | This statement was reworded as:  “If electric cardioversion is not effective, amiodarone may be an option in selected patients who are haemodynamically unstable or with severely impaired LVEF” [8,15,16]. |
| 21. If electric cardioversion is not effective, landiolol can be an option, if not contraindicated to beta-blockade [17,18,19]. | 100.0% | 0.0% | 0.0% | 100.0% | 0.0% | AGREEMENT |  |
| 22. If electric cardioversion is not effective, landiolol can be an option after amiodarone [19,20]. | 42.9% | 28.6% | 28.6% | 71.4% | 57.1% | DISAGREEMENT AND REWORDED | This statement was reworded as:  “If electric cardioversion is not effective, landiolol can be an alternative to amiodarone, after echocardiographic exclusion of severe LV systolic dysfunction” [19,20]. |
| 23. Esmolol, given its profile and potential hypotensive effect, is not recommended as a first choice for beta-blockade [21,22,23]. | 57.1% | 28.6% | 14.3% | 85.7% | 42.9% | DISAGREEMENT AND REWORDED | This statement was reworded as:  “Esmolol, when landiolol is not available, remains an alternative, but similarly to landiolol, it will necessitate careful titration and tight HR and BP monitoring to anticipate potential bradycardia and hypotensive effect” [21,22,23]. |
|  | | | | | | |  |
| **Area 4 – Pharmacological approach to AFib in critically ill patients** | **% 7 - 9** | **% 4 - 6** | **% 1 - 3** | **% 4 - 9** | **% 1 - 6** |  |  |
| 24. The concept of HR control or rhythm control in the critical setting has not the same significance as in cardiology setting. Indeed, in the context of new onset atrial fibrillation occurring in critical care, drugs routinely used potentially provide both rate and/or rhythm control [6,15,24,25]. | 85.7% | 0.0% | 14.3% | 85.7% | 14.3% | AGREEMENT |  |
| 25. For “not crushing” patients/with no severe hemodynamic instability, HR or rhythm control should be done after controlling the triggers [5,8,15]. | 71.4% | 14.3% | 14.3% | 85.7% | 28.6% | DISAGREEMENT AND REWORDED | This statement was reworded as:  “For “not crushing” patients/with no severe hemodynamic instability, HR or rhythm control should be done after or along controlling the triggers” [8, 21,41]. |
| 26. Amiodarone can be an option for HR/rhythm control in patients with not too severe hemodynamic instability [5,8,15]. | 28.6% | 42.9% | 28.6% | 71.4% | 71.4% | DISAGREEMENT AND EXCLUDED |  |
| 27. Landiolol can be an option for HR/rhythm control in patients with not too severe hemodynamic instability [23,26,27]. | 57.1% | 14.3% | 28.6% | 71.4% | 42.9% | DISAGREEMENT AND EXCLUDED |  |
| 28. Digoxin is not recommended in the presence of dyskalaemia and hypoxemia. Furthermore, digoxin efficacy is lower in high adrenergic tone. | 71.4% | 28.6% | 0.0% | 100.0% | 28.6% | DISAGREEMENT AND REWORDED | This statement was reworded as:  “Digoxin remains a feasible option unless contra-indicated (e.g. dyskalaemia, dyscalcaemia, hypoxia)”. |
| 29. In absence of hemodynamic instability and in case of preexisting AFib of unknown duration which is associated with the risk of inducing a stroke, amiodarone is not an option [5,8,15]. | 85.7% | 0.0% | 14.3% | 85.7% | 14.3% | AGREEMENT |  |
| 30. In absence of hemodynamic instability and in case of preexisting AFib of unknown duration which is associated with the risk of inducing a stroke, landiolol represent an option. | 57.1% | 28.6% | 14.3% | 85.7% | 42.9% | DISAGREEMENT AND REWORDED | This statement was reworded as:  “Landiolol represents an option in case of preexisting AFib of unknown duration which is associated with the risk of inducing a stroke”. |
| 31. Septic patients with EF below 35% should not be treated with landiolol [26,28,29]. | 28.6% | 14.3% | 57.1% | 42.9% | 71.4% | DISAGREEMENT AND REWORDED | This statement was reworded as:  “In septic shock patients with EF below 35%, landiolol should be only used with caution in patients contra-indicated to amiodarone” [26,28,29]. |
| 32. Non-septic patients with EF below 35% as low as 25% could be treated with landiolol [30,31,32,33,34,35]. | 85.7% | 0.0% | 14.3% | 85.7% | 14.3% | AGREEMENT |  |
| 33. Landiolol should not be used in (hypodynamic)/cardiogenic (SCAI CDE) shock [5,8,36,37]. | 71.4% | 28.6% | 0.0% | 100.0% | 28.6% | DISAGREEMENT AND REWORDED | This statement was reworded as:  “Landiolol should not be used in cardiogenic shock, as it is contra-indicated” [5,8,36,37]. |
|  | | | | | | |  |
| **Area 5 – Titration of landiolol and HR goal to reached** | **% 7 - 9** | **% 4 - 6** | **% 1 - 3** | **% 4 - 9** | **% 1 - 6** |  |  |
| 34. For starting landiolol therapy to treat AFib, dosing should be started as infusion without bolus. | 71.4% | 14.3% | 14.3% | 85.7% | 28.6% | DISAGREEMENT AND REWORDED | This statement was reworded as:  “For starting landiolol therapy to treat Afib, dosing should be initiated as infusion without bolus, especially in crushing patients or in case of hemodynamically instability”. |
| 35. Starting dose in critical care setting should be 1mcg/kg/min with a slow titration of 1mcg/kg/min step every 15-20 min. | 100.0% | 0.0% | 0.0% | 100.0% | 0.0% | AGREEMENT |  |
| 36. For patients with low cardiac output and low EF (< 35%) one should be especially careful to start with a low dose and to titrate slowly. (Increase pace of titration if needed). | 85.7% | 0.0% | 14.3% | 85.7% | 14.3% | AGREEMENT |  |
| 37. Initial HR target should be set at < 110 bpm [8,15]. | 85.7% | 14.3% | 0.0% | 100.0% | 14.3% | AGREEMENT |  |
| 38. Further reduction of HR with additional titration should be done based upon individualised patient response evaluated by close hemodynamic monitoring/ECHO to assess the tolerance [2,5]. | 100.0% | 0.0% | 0.0% | 100.0% | 0.0% | AGREEMENT |  |
| 39. Lowering target to <95 bpm without advanced cardiac output monitoring is not recommended as it may harm the patient. | 71.4% | 14.3% | 14.3% | 85.7% | 28.6% | DISAGREEMENT AND MAINTAINED |  |
| 40. The optimal HR target should be 90 bpm, because this is the best value for atrial/ventricular coupling providing the highest EF [11,38]. | 28.6% | 42.9% | 28.6% | 71.4% | 71.4% | DISAGREEMENT AND EXCLUDED | This statement was excluded because a fixed HR target is not universally applicable in AFib, as optimal HR varies across individuals and depends on atrioventricular coupling, afterload, and overall hemodynamic context. |
| 41. In patient with hemodynamic stable condition under vasopressor, it is advised to make a test to evaluate landiolol tolerance and hemodynamic response versus expected natural course of disease. | 87.5% | 12.5% | 0.0% | 100.0% | 12.5% | DISAGREEMENT AND MAINTAINED |  |
| 42. In patient with rapid AF, it is recommended to select a HR target not lower than a 30% decrease of baseline HR. | 71.4% | 0.0% | 28.6% | 71.4% | 28.6% | DISAGREEMENT AND EXCLUDED | This statement was excluded because a fixed HR reduction does not account for individual cardiac function and hemodynamic monitoring-guided titration. |
|  | | | | | | |  |
| **Area 6 – Duration of therapy with landiolol** | **% 7 - 9** | **% 4 - 6** | **% 1 - 3** | **% 4 - 9** | **% 1 - 6** |  |  |
| 43. Landiolol infusion should not be discontinued abruptly [39]. | 71.4% | 14.3% | 14.3% | 85.7% | 28.6% | DISAGREEMENT AND REWORDED | This statement was reworded as:  “Landiolol infusion should not be discontinued abruptly except for resolving adverse events” [39]. |
| 44. If rate control is obtained, landiolol should be continued for 2-3 days until vasopressor weaning or conversion to sinus rhythm [26,39]. | 71.4% | 0.0% | 28.6% | 71.4% | 28.6% | DISAGREEMENT AND REWORDED | This statement was reworded as:  “If rate control is obtained, landiolol should be continued until vasopressor weaning or conversion to sinus rhythm followed by conversion to oral beta blockers” [26,39]. |
|  | | | | | | |  |
| **Area 7 – Therapy after stopping landiolol** | **% 7 - 9** | **% 4 - 6** | **% 1 - 3** | **% 4 - 9** | **% 1 - 6** |  |  |
| 45. After stopping landiolol, the patient should be switched to an oral beta-blocker (e.g., bisoprolol) to avoid recurrence of atrial fibrillation [34,39]. | 85.7% | 0.0% | 14.3% | 85.7% | 14.3% | AGREEMENT |  |
| 46. It is reasonable to rely on oral beta-blockers when enteral route is active again (e.g. patient on enteral nutrition). | 85.7% | 14.3% | 0.0% | 100.0% | 14.3% | AGREEMENT |  |
| 47. For patients with pre-existing morbid conditions (hypertension, vascular or cardiac disease, etc.) where beta-blockers are indicated and should be initiated before ICU discharge (and discuss/refer to cardiologist) [40,41]. | 100.0% | 0.0% | 0.0% | 100.0% | 0.0% | AGREEMENT |  |
| 48. For patients with preexisting chronic beta-blockers, treatment should not be stopped if possible or reinitiated as soon as possible before ICU discharge [12]. | 71.4% | 14.3% | 14.3% | 85.7% | 28.6% | DISAGREEMENT AND REWORDED | This statement was reworded as:  “For patients with preexisting chronic beta-blockers, the treatment should be reinitiated as soon as possible even before the ICU discharge” [12]. |
|  | | | | | | |  |
| **Area 8 – Alternative option in case of partial success or failure with landiolol** | **% 7 - 9** | **% 4 - 6** | **% 1 - 3** | **% 4 - 9** | **% 1 - 6** |  |  |
| 49. If rate control is not achieved with landiolol, intensivist can select alternative option like electrical cardioversion or amiodarone after having excluded any risk of thromboembolism evaluated with echography [8,15]. | 71.4% | 14.3% | 14.3% | 85.7% | 28.6% | DISAGREEMENT AND REWORDED | This statement was reworded as:  “If rate control is not achieved with landiolol, intensivist can select alternative option like amiodarone or digoxin” [8,15]. |
| 50. Amiodarone may be preferred to electrical cardioversion in critical care patients with high adrenergic tone or inflammation because the high rate of relapse after EC [8,15]. | 42.9% | 28.6% | 28.6% | 71.4% | 57.1% | DISAGREEMENT AND REWORDED | This statement was reworded as:  “Amiodarone, alone or combined to electrical cardioversion, may be preferred in critical care patients with high adrenergic tone or inflammation because of the high rate of relapse after electrical cardioversion” [8,15]. |
| 51. Intensivist should call for cardiologist for further consultation on how to proceed in difficult patient (e.g. catheter ablation) [8,15]. | 85.7% | 0.0% | 14.3% | 85.7% | 14.3% | AGREEMENT |  |
| 52. If return to sinus rhythm is not achieved with landiolol, intensivist can select alternative option like electrical cardioversion or amiodarone after having excluded any risk of thromboembolism evaluated with echography [8,15]. | 42.9% | 28.6% | 28.6% | 71.4% | 57.1% | DISAGREEMENT AND EXCLUDED | The statement was excluded because exclusion of intracardiac thrombus alone was insufficient to guide clinical decision-making. |
|  | | | | | | |  |
| **Area 9 – Landiolol and concomitant use of positive inotropic agents** | **% 7 - 9** | **% 4 - 6** | **% 1 - 3** | **% 4 - 9** | **% 1 - 6** |  |  |
| 53. Before deciding to initiate an inotrope in rapid AF patient, clinicians need to assess the global cardiovascular pathophysiology, with particularly focus to elastance [11]. | 57.1% | 42.9% | 0.0% | 100.0% | 42.9% | DISAGREEMENT AND REWORDED | This statement was reworded as:  “Before deciding to initiate an inotrope in rapid AF patient, we suggest clinicians to assess the global cardiovascular pathophysiology, with focus on coupling of ventricular to arterial elastance” [11]. |
| 54. If inotrope support is needed in Afib patients treated with landiolol, levosimendan is suggested an option of choice because of its mechanism of action [9]. | 85.7% | 14.3% | 0.0% | 100.0% | 14.3% | AGREEMENT |  |
| 55. Phosphodiesterase III inhibitors may be used providing hypotension is adequately controlled [30,42,43]. | 71.4% | 14.3% | 14.3% | 85.7% | 28.6% | DISAGREEMENT AND EXCLUDED | The statement was excluded because available information was insufficient and concerns were raised about adverse effects related to cAMP-mediated actions. |
| AF, Atrial Fibrillation; AFib, Atrial Fibrillation; BP, Blood Pressure; bpm, beats per minute; CCU/CICU, Coronary Care Unit/Cardiac Intensive Care Unit; EC, Electric Cardioversion; EF, Ejection Fraction; HR, Heart Rate; ICU, Intensive Care Unit; LA, Left Atrial; LV, Left Ventricular; LVEF, Left Ventricular Ejection Fraction; SCAI CDE, ; SmPC, Summary of Product Characteristics. | | | | | | | |

**References:**

1. Andreasen AS, Wetterslev M, Sigurdsson MI, Bove J, Kjaergaard J, Aslam TN, et al. New-onset atrial fibrillation in critically ill adult patients-an SSAI clinical practice guideline. Acta Anaesthesiol Scand. 2023;67(8):1110-7. doi: 10.1111/aas.14262.

2. Arrigo M, Bettex D, Rudiger A. Management of atrial fibrillation in critically ill patients. Crit Care Res Pract. 2014;2014:840615. doi: 10.1155/2014/840615.

3. Bedford JP, Ede J, Watkinson PJ. Triggers for new-onset atrial fibrillation in critically ill patients. Intensive Crit Care Nurs. 2021;67:103114. doi: 10.1016/j.iccn.2021.103114.

4. Bedford JP, Garside T, DarbyshireJL, Betts TR, Young JD, Watkinson PJ. Risk factors for new-onset atrial fibrillation during critical illness: A Delphi study. J Intensive Care Soc. 2022;23(4):414-24. doi: 10.1177/17511437211022132.

5. Boriani G, Fauchier L, Aguinaga L, Beattie JM, Blomstrom Lundqvist C, Cohen A, et al. European Heart Rhythm Association (EHRA) consensus document on management of arrhythmias and cardiac electronic devices in the critically ill and post-surgery patient, endorsed by Heart Rhythm Society (HRS), Asia Pacific Heart Rhythm Society (APHRS), Cardiac Arrhythmia Society of Southern Africa (CASSA), and Latin American Heart Rhythm Society (LAHRS). Europace. 2019;21(1):7-8. doi: 10.1093/europace/euy110.

6. Bosch NA, Cimini J, Walkey AJ. Atrial Fibrillation in the ICU. Chest. 2018;154(6):1424-34. doi: 10.1016/j.chest.2018.03.040.

7. Bosch NA, Cohen DM, Walkey AJ. Risk Factors for New-Onset Atrial Fibrillation in Patients With Sepsis: A Systematic Review and Meta-Analysis. Crit Care Med. 2019;47(2):280-7. doi:10.1097/CCM.0000000000003560.

8. Hindricks G, Potpara T, Dagres N, Arbelo E, Bax JJ, Blomström-Lundqvist C, et al. 2020 ESC Guidelines for the diagnosis and management of atrial fibrillation developed in collaboration with the European Association for Cardio-Thoracic Surgery (EACTS): The Task Force for the diagnosis and management of atrial fibrillation of the European Society of Cardiology (ESC) Developed with the special contribution of the European Heart Rhythm Association (EHRA) of the ESC. Eur Heart J. 2021;42(5):373-498. doi: 10.1093/eurheartj/ehaa612. Erratum in: Eur Heart J. 2021;42(5):507. doi: 10.1093/eurheartj/ehaa798. Erratum in: Eur Heart J. 2021;42(5):546-7. doi: 10.1093/eurheartj/ehaa945. Erratum in: Eur Heart J. 2021;42(40):4194. doi: 10.1093/eurheartj/ehab648.

9. Dabrowski W, Siwicka-Gieroba D, Piasek E, Schlegel TT, Jaroszynski A. Successful Combination of Landiolol and Levosimendan in Patients with Decompensated Heart Failure. Int Heart J. 2020;61(2):384-9. doi: 10.1536/ihj.19-420.

10. Iwahashi N, Kirigaya J, Abe T, Horii M, Takahashi H, Hanajima Y, et al. Clinical usefulness of left ventricular outflow tract velocity time integral for heart failure with reduced ejection fraction with rapid atrial fibrillation during landiolol treatment. J Cardiol. 2022;79(1):21-9. doi: 10.1016/j.jjcc.2021.09.008.

11. Guarracino F, Bertini P, Pinsky MR. Management of cardiovascular insufficiency in ICU: the BEAT approach. Minerva Anestesiol. 2021;87(4):476-80. doi: 10.23736/S0375-9393.20.14613-3.

12. Fuchs C, Wauschkuhn S, Scheer C, Vollmer M, Meissner K, Kuhn SO, et al. Continuing chronic beta-blockade in the acute phase of severe sepsis and septic shock is associated with decreased mortality rates up to 90 days. Br J Anaesth. 2017;119(4):616-25. doi: 10.1093/bja/aex231.

13. Arrigo M, Jaeger N, Seifert B, Spahn DR, Bettex D, Rudiger A. Disappointing Success of Electrical Cardioversion for New-Onset Atrial Fibrillation in Cardiosurgical ICU Patients. Crit Care Med. 2015;43(11):2354-9. doi: 10.1097/CCM.0000000000001257.

14. Arrigo M, Mebazaa A, Bettex D, Rudiger A. Hemodynamic response of restoring sinus rhythm in critically ill patients with atrial fibrillation. Am J Emerg Med. 2020;38(6):1192-4. doi: 10.1016/j.ajem.2020.02.027.

15. Van Gelder IC, Rienstra M, Bunting KV, Casado-Arroyo R, Caso V, Crijns H, et al. 2024 ESC Guidelines for the management of atrial fibrillation developed in collaboration with the European Association for Cardio-Thoracic Surgery (EACTS). Eur Heart J. 2024;45(36):3314-414. doi: 10.1093/eurheartj/ehae176.

16. Wetterslev M, Haase N, Hassager C, Belley-Cote EP, McIntyre WF, An Y, et al. New-onset atrial fibrillation in adult critically ill patients: a scoping review. Intensive Care Med. 2019;45(7):928-38. doi: 10.1007/s00134 019-05633-x.

17. Dan GA, Dan AR, Ivanescu A, Buzea AC. Acute rate control in atrial fibrillation: an urgent need for the clinician. Eur Heart J Suppl 2022;24 Suppl D:D3-D10. doi: 10.1093/eurheartjsupp/suac022.

18. Dan GA. Foreword: Acute optimization of heart rate in atrial fibrillation: landiolol as a first line therapy. Eur Heart J Suppl 2022;24 Suppl D:D1-D2. doi: 10.1093/eurheartjsupp/suac028.

19. Ditali V, Garatti L, Morici N, Villanova L, Colombo C, Oliva F, et al. Effect of landiolol in patients with tachyarrhythmias and acute decompensated heart failure (ADHF): a case series. ESC Heart Fail. 2022;9(1):766-70. doi: 10.1002/ehf2.13763.

20. Shibata SC, Uchiyama A, Ohta N, Fujino Y. Efficacy and Safety of Landiolol Compared to Amiodarone for the Management of Postoperative Atrial Fibrillation in Intensive Care Patients. J Cardiothorac Vasc Anesth. 2016;30(2):418-22. doi: 10.1053/j.jvca.2015.09.007.

21. Brown SM, Beesley SJ, Lanspa MJ, Grissom CK, Wilson EL, Parikh SM, et al. Esmolol infusion in patients with septic shock and tachycardia: a prospective, single-arm, feasibility study. Pilot Feasibility Stud. 2018;4:132. doi:10.1186/s40814-018-0321-5.

22. Cocchi MN, Dargin J, Chase M, Patel PV, Grossestreuer A, Balaji L, et al. Esmolol to Treat the Hemodynamic Effects of Septic Shock: A Randomized Controlled Trial. Shock. 2022;57(4):508-17. doi: 10.1097/SHK.0000000000001905.

23. Levy B, Fritz C, Piona C, Duarte K, Morelli A, Guerci P, et al. Hemodynamic and anti-inflammatory effects of early esmolol use in hyperkinetic septic shock: a pilot study. Crit Care. 2021;25(1):21. doi: 10.1186/s13054-020-03445-w.

24. Guarracino F, Cortegiani A, Antonelli M, Behr A, Biancofiore G, Del Gaudio A, et al. The role of beta-blocker drugs in critically ill patients: a SIAARTI expert consensus statement. J Anesth Analg Crit Care. 2023;3(1):41. doi: 10.1186/s44158-023-00126-2.

25. O'Brien B, Burrage PS, Ngai JY, Prutkin JM, Huang CC, Xu X, et al. Society of Cardiovascular Anesthesiologists/European Association of Cardiothoracic Anaesthetists Practice Advisory for the Management of Perioperative Atrial Fibrillation in Patients Undergoing Cardiac Surgery. J Cardiothorac Vasc Anesth. 2019;33(1):12-26. doi: 10.1053/j.jvca.2018.09.039.

26. Kakihana Y, Nishida O, Taniguchi T, Okajima M, Morimatsu H, Ogura H, et al. Efficacy and safety of landiolol, an ultra-short-acting β1-selective antagonist, for treatment of sepsis-related tachyarrhythmia (J-Land 3S): a multicentre, open-label, randomised controlled trial. The Lancet Respiratory Medicine. 2020;8(9):863-72. doi: 10.1016/S2213-2600(20)30037-0.

27. Okajima M, Takamura M, Taniguchi T. Landiolol, an ultra-short-acting β1-blocker, is useful for managing supraventricular tachyarrhythmias in sepsis. World J Crit Care Med. 2015;4(3):251-7. doi: 10.5492/wjccm.v4.i3.251.

28. Matsuda N, Nishida O, Taniguchi T, Okajima M, Morimatsu H, Ogura H, et al. Impact of patient characteristics on the efficacy and safety of landiolol in patients with sepsis-related tachyarrhythmia: Subanalysis of the J-Land 3S randomised controlled study. EClinicalMedicine. 2020;28:100571. doi:10.1016/j.eclinm.2020.100571.

29. Rehberg S, Frank S, Černý V, Cihlar R, Borgstedt R, Biancofiore G, et al. Landiolol for heart rate control in patients with septic shock and persistent tachycardia. A multicenter randomized clinical trial (Landi-SEP). Intensive Care Med. 2024;50(10):1622-34. doi:10.1007/s00134-024-07587-1.

30. Iwahashi N, Takahashi H, Abe T, Okada K, Akiyama E, Matsuzawa Y, et al. Urgent Control of Rapid Atrial Fibrillation by Landiolol in Patients With Acute Decompensated Heart Failure With Severely Reduced Ejection Fraction. Circulation Reports. 2019;1(10):422-30. doi: 10.1253/circrep.CR-19-0076.

31. Kinugawa K, Nagai R, Inoue H, Atarashi H, Seino Y, Yamashita T, et al. Impacts of patient characteristics on the effectiveness of landiolol in AF/AFL patients complicated with LV dysfunction: Subgroup analysis of the J-Land study. Adv Ther. 2014;31(4):426-39. doi: 10.1007/s12325-014-0111-2.

32. Nagai R, Kinugawa K, Inoue H, Atarashi H, Seino Y, Yamashita T, et al. Urgent management of rapid heart rate in patients with atrial fibrillation/flutter and left ventricular dysfunction: comparison of the ultra-short-acting β1-selective blocker landiolol with digoxin (J-Land Study). Circ J. 2013;77(4):908-16. doi: 10.1253/circj.cj-12-1618.

33. Shinohara M, Wada R, Yano K, Akitsu K, Koike H, Kinoshita T, et al. Comparison of Landiolol and Digoxin as an Intravenous Drug for Controlling the Heart Rate in Patients with Atrial Fibrillation and Severely Depressed Left Ventricular Function. Int Heart J. 2020;61(5):944-50. doi: 10.1536/ihj.20-256.

34. Yamashita T, Nakasu Y, Mizutani H, Sumitani K. A prospective observational survey on landiolol in atrial fibrillation/atrial flutter patients with chronic heart failure - AF-CHF landiolol survey. J Cardiol. 2019;74(5):418-25. doi: 10.1016/j.jjcc.2019.05.012.

35. Yamashita T, Nakasu Y, Mizutani H, Sumitani K. Mid-Term Prognosis After Landiolol Treatment in Atrial Fibrillation/Atrial Flutter Patients With Chronic Heart Failure - A Prospective Observational Survey (AF-CHF Landiolol Survey). Circ Rep. 2020;3(1):34-43. doi: 10.1253/circrep.CR-20-0119.

36. N Naidu SS, Baran DA, Jentzer JC, Hollenberg SM, van Diepen S, Basir MB, et al. SCAI SHOCK Stage Classification Expert Consensus Update: A Review and Incorporation of Validation Studies: This statement was endorsed by the American College of Cardiology (ACC), American College of Emergency Physicians (ACEP), American Heart Association (AHA), European Society of Cardiology (ESC) Association for Acute Cardiovascular Care (ACVC), International Society for Heart and Lung Transplantation (ISHLT), Society of Critical Care Medicine (SCCM), and Society of Thoracic Surgeons (STS) in December 2021. J Am Coll Cardiol. 2022;79(9):933-46. doi: 10.1016/j.jacc.2022.01.018.

37. Schurtz G, Mewton N, Lemesle G, Delmas C, Levy B, Puymirat E, et al. Beta-blocker management in patients admitted for acute heart failure and reduced ejection fraction: a review and expert consensus opinion. Front Cardiovasc Med. 2023;10:1263482. doi: 10.3389/fcvm.2023.1263482.

38. Guarracino F, Bertini P, Pinsky MR. Management of cardiovascular insufficiency in ICU: the BEAT approach. Minerva Anestesiol. 2021;87(4):476-80. doi: 10.23736/S0375-9393.20.14613-3.

39. Levy B, Slama M, Lakbar I, Maizel J, Kato H, Leone M, et al. Landiolol for Treatment of New-Onset Atrial Fibrillation in Critical Care: A Systematic Review. J Clin Med. 2024;13(10):2951. doi: 10.3390/jcm13102951.

40. Böhm M, Link A, Cai D, Nieminen MS, Filippatos GS, Salem R, et al. Beneficial association of β-blocker therapy on recovery from severe acute heart failure treatment: data from the Survival of Patients With Acute Heart Failure in Need of Intravenous Inotropic Support trial. Crit Care Med. 2011;39(5):940-4. doi: 10.1097/CCM.0b013e31820a91ed.

41. Noveanu M, Breidthardt T, Reichlin T, Gayat E, Potocki M, Pargger H, et al. Effect of oral β-blocker on short and long-term mortality in patients with acute respiratory failure: results from the BASEL-II-ICU study. Crit Care. 2010;14(6):R198. doi: 10.1186/cc9317.

42. Kobayashi S, Susa T, Ishiguchi H, Myoren T, Murakami W, Kato T, et al. A low-dose β1-blocker in combination with milrinone improves intracellular Ca2+ handling in failing cardiomyocytes by inhibition of milrinone-induced diastolic Ca2+ leakage from the sarcoplasmic reticulum. PLoS One. 2015;10(1):e0114314. doi: 10.1371/journal.pone.0114314.

43. Kobayashi S, Susa T, Tanaka T, Murakami W, Fukuta S, Okuda S, et al. Low-dose β blocker in combination with milrinone safely improves cardiac function and eliminates pulsus alternans in patients with acute decompensated heart failure. Circ J. 2012;76(7):1646-53. doi: 10.1253/circj.cj-12-0033.

44. Hifumi T, Kato H, Koido Y, Kawakita K, Kuroda Y. Safety and effective use of landiolol in the ICU. J Intensive Care. 2014;2(1):16. doi: 10.1186/2052-0492-2-16.

45. Schortgen F, Clabault K, Katsahian S, Devaquet J, Mercat A, Deye N, et al. Fever control using external cooling in septic shock: a randomized controlled trial. Am J Respir Crit Care Med. 2012;185(10):1088-95. doi: 10.1164/rccm.201110-1820OC.
