# Supplementary material
Source: Research Square preprint supplement (doi:10.21203/rs.3.rs-9269792/v1)
Supplement: Supplementary file 2 [file 3a1e05e0caf4307c91e9f0ac.docx]

# **Supplementary Table 4.** Round 2 results.

| **Statement** | **Level of aggregation** | | | | | **Result** | **Notes** |
| --- | --- | --- | --- | --- | --- | --- | --- |
| **Area 1 - Treatment of potential triggers of AFib in septic shock patient** | **% 7 - 9** | **% 4 - 6** | **% 1 - 3** | **% 4 - 9** | **% 1 - 6** |  |  |
| 4. At first presentation of septic shock patient with AFib, pain or anxiety (e.g. postoperative) should be detected before starting controlling HR [1,2,3,4,5,6,7,8,44]. | 87.5% | 0.0% | 12.5% | 87.5% | 12.5% | AGREEMENT |  |
| 6. At first presentation of septic shock patient with AFib, suspected hypomagnesemia may be identified and corrected before starting controlling HR with landiolol, but without delaying in case of hemodynamic instability [1,2,3,4,5,6,7,8,9]. | 87.5% | 0.0% | 12.5% | 87.5% | 12.5% | AGREEMENT |  |
| 7. In case of AFib in stabilised septic shock patient, doses of catecholamine (vasopressors, inotrope) should be revaluated and non-catecholamine vasopressors (e.g. vasopressin) may be considered as it allows to decrease catecholamine doses and HR along with contemplating starting controlling HR [1,2,3,4,5,6,7,8]. | 100.0% | 0.0% | 0.0% | 100.0% | 0.0% | AGREEMENT |  |
| 8. At first presentation of septic shock patient with AFib, high fever should be detected and could be treated before starting controlling HR but without delaying in case of hemodynamic instability [1,2,3,4,5,6,7,8,45]. | 87.5% | 12.5% | 0.0% | 100.0% | 12.5% | AGREEMENT |  |
| 10. At first presentation of septic shock patient with AFib, severe anaemia and in absence of hypovolemia should be identified, and its management should be initiated along with starting controlling HR, and without delay in case of hemodynamic instability [1,2,3,4,5,6,7,8]. | 100.0% | 0.0% | 0.0% | 100.0% | 0.0% | AGREEMENT |  |
| 11. At first presentation of septic shock patient with AFib, myocardial ischemia should be detected and treated, but HR control should not be delayed as tachycardia contributes to increase DO2/VO2 imbalance and induce further critical ischemia [1,2,3,4,5,6,7,8]. | 87.5% | 12.5% | 0.0% | 100.0% | 12.5% | AGREEMENT |  |
| 12. Endocrine disorders (pheochromocytoma or elevated thyroid hormones) should be investigated in the context of HR control as a potential trigger to further adjust patient management [1,2,3,4,5,6,7,8]. | 100.0% | 0.0% | 0.0% | 100.0% | 0.0% | AGREEMENT |  |
|  | | | | | | |  |
| **Area 2 - Hemodynamic assessment in septic shock patient before HR control** | **% 7 - 9** | **% 4 - 6** | **% 1 - 3** | **% 4 - 9** | **% 1 - 6** |  |  |
| 14. Determination of hemodynamic parameters with continuous HR and BP and is the minimum requirement to control patient response/condition, and advanced monitoring for cardiac assessment is recommended [5,8,10]. | 87.5% | 12.5% | 0.0% | 100.0% | 12.5% | AGREEMENT |  |
|  | | | | | | |  |
| **Area 3 - Individualised cardioversion approach to AFib in critically ill patients** | **% 7 - 9** | **% 4 - 6** | **% 1 - 3** | **% 4 - 9** | **% 1 - 6** |  |  |
| 20. If electric cardioversion is not effective, amiodarone may be an option in selected patients who are haemodynamically unstable or with severely impaired LVEF [8,15,16]. | 87.5% | 12.5% | 0.0% | 100.0% | 12.5% | AGREEMENT |  |
| 22. If electric cardioversion is not effective, landiolol can be an alternative to amiodarone, after echocardiographic exclusion of severe LV systolic dysfunction [19,20]. | 87.5% | 0.0% | 12.5% | 87.5% | 12.5% | AGREEMENT |  |
| 23. Esmolol, when landiolol is not available, remains an alternative, but similarly to landiolol, it will necessitate careful titration and tight HR and BP monitoring to anticipate potential bradycardia and hypotensive effect [21,22,23]. | 75.5% | 12.5% | 12.5% | 87.5% | 25.0% | DISAGREEMENT |  |
|  | | | | | | |  |
| **Area 4 – Pharmacological approach to AFib in critically ill patients** | **% 7 - 9** | **% 4 - 6** | **% 1 - 3** | **% 4 - 9** | **% 1 - 6** |  |  |
| 25. For “not crushing” patients/with no severe hemodynamic instability, HR or rhythm control should be done after or along controlling the triggers [5,8,15]. | 100.0% | 0.0% | 0.0% | 100.0% | 0.0% | AGREEMENT |  |
| 28. Digoxin remains a feasible option unless contra-indicated (e.g. dyskalaemia, dyscalcaemia, hypoxia). | 75.0% | 12.5% | 12.5% | 87.5% | 25.0% | DISAGREEMENT |  |
| 30. Landiolol represents an option in case of preexisting AFib of unknown duration which is associated with the risk of inducing a stroke. | 75.0% | 25.0% | 0.0% | 100.0% | 25.0% | DISAGREEMENT |  |
| 31. In septic shock patients with EF below 35%, landiolol should be only used with caution in patients contra-indicated to amiodarone. [26,28,29]. | 75.0% | 12.5% | 12.5% | 87.5% | 25.0% | DISAGREEMENT |  |
| 33. Landiolol should not be used in cardiogenic shock, as it is contra-indicated [5,8,36,37]. | 62.5% | 37.5% | 0.0% | 100.0% | 37.5% | DISAGREEMENT | . |
|  | | | | | | |  |
| **Area 5 – Titration of landiolol and HR goal to reached** | **% 7 - 9** | **% 4 - 6** | **% 1 - 3** | **% 4 - 9** | **% 1 - 6** |  |  |
| 34. For starting landiolol therapy to treat Afib, dosing should be initiated as infusion without bolus, especially in crushing patients or in case of hemodynamically instability. | 100.0% | 0.0% | 0.0% | 100.0% | 0.0% | AGREEMENT |  |
| 39. Lowering target to <95 bpm without advanced cardiac output monitoring is not recommended as it may harm the patient. | 100.0% | 0.0% | 0.0% | 100.0% | 0.0% | AGREEMENT |  |
| 41. In patient with hemodynamic stable condition under vasopressor, it is advised to make a test to evaluate landiolol tolerance and hemodynamic response versus expected natural course of disease. | 87.5% | 12.5% | 0.0% | 100.0% | 12.5% | AGREEMENT |  |
|  | | | | | | |  |
| **Area 6 – Duration of therapy with landiolol** | **% 7 - 9** | **% 4 - 6** | **% 1 - 3** | **% 4 - 9** | **% 1 - 6** |  |  |
| 43. Landiolol infusion should not be discontinued abruptly except for resolving adverse events [39]. | 75.0% | 12.5% | 12.5% | 87.5% | 25.0% | DISAGREEMENT AND EXCLUDED | Statement excluded from the final results. |
| 44. If rate control is obtained, landiolol should be continued until vasopressor weaning or conversion to sinus rhythm followed by conversion to oral beta blockers [26,39]. | 75.0% | 12.5% | 12.5% | 87.5% | 25.0% | DISAGREEMENT AND EXCLUDED | Statement excluded from the final results because it was not possible to draw a robust conclusion, given the restricted range of clinical scenarios discussed. |
|  | | | | | | |  |
| **Area 7 – Therapy after stopping landiolol** | **% 7 - 9** | **% 4 - 6** | **% 1 - 3** | **% 4 - 9** | **% 1 - 6** |  |  |
| 48. For patients with preexisting chronic beta-blockers, the treatment should be reinitiated as soon as possible even before the ICU discharge [12]. | 100.0% | 0.0% | 0.0% | 100.0% | 0.0% | AGREEMENT |  |
|  | | | | | | |  |
| **Area 8 – Alternative option in case of partial success or failure with landiolol** | **% 7 - 9** | **% 4 - 6** | **% 1 - 3** | **% 4 - 9** | **% 1 - 6** |  |  |
| 49. If rate control is not achieved with landiolol, intensivist can select alternative option like amiodarone o digoxin [8,15]. | 100.0% | 0.0% | 0.0% | 100.0% | 0.0% | AGREEMENT |  |
| 50. Amiodarone, alone or combined to electrical cardioversion, may be preferred in critical care patients with high adrenergic tone or inflammation because of the high rate of relapse after electrical cardioversion [8,15]. | 50.0% | 12.5% | 37.5% | 62.5% | 50.0% | DISPERSED OPINION AND EXCLUDED | Statement excluded from the final results due to dispersed opinion. |
|  | | | | | | |  |
| **Area 9 – Landiolol and concomitant use of positive inotropic agents** | **% 7 - 9** | **% 4 - 6** | **% 1 - 3** | **% 4 - 9** | **% 1 - 6** |  |  |
| 53. Before deciding to initiate an inotrope in rapid AF patient, we suggest clinicians to assess the global cardiovascular pathophysiology, with focus on coupling of ventricular to arterial elastance [11]. | 75.0% | 0.0% | 25.0% | 75.0% | 25.0% | DISAGREEMENT | Statement excluded from the final results because it addressed a highly specialised concept. |
| AF, Atrial Fibrillation; AFib, Atrial Fibrillation; BP, Blood Pressure; bpm, beats per minute; CCU/CICU, Coronary Care Unit/Cardiac Intensive Care Unit; EC, Electric Cardioversion; EF, Ejection Fraction; HR, Heart Rate; ICU, Intensive Care Unit; LA, Left Atrial; LV, Left Ventricular; LVEF, Left Ventricular Ejection Fraction; SCAI CDE, ; SmPC, Summary of Product Characteristics. | | | | | | | |

**References:**

1. Andreasen AS, Wetterslev M, Sigurdsson MI, Bove J, Kjaergaard J, Aslam TN, et al. New-onset atrial fibrillation in critically ill adult patients-an SSAI clinical practice guideline. Acta Anaesthesiol Scand. 2023;67(8):1110-7. doi: 10.1111/aas.14262.

2. Arrigo M, Bettex D, Rudiger A. Management of atrial fibrillation in critically ill patients. Crit Care Res Pract. 2014;2014:840615. doi: 10.1155/2014/840615.

3. Bedford JP, Ede J, Watkinson PJ. Triggers for new-onset atrial fibrillation in critically ill patients. Intensive Crit Care Nurs. 2021;67:103114. doi: 10.1016/j.iccn.2021.103114.

4. Bedford JP, Garside T, DarbyshireJL, Betts TR, Young JD, Watkinson PJ. Risk factors for new-onset atrial fibrillation during critical illness: A Delphi study. J Intensive Care Soc. 2022;23(4):414-24. doi: 10.1177/17511437211022132.

5. Boriani G, Fauchier L, Aguinaga L, Beattie JM, Blomstrom Lundqvist C, Cohen A, et al. European Heart Rhythm Association (EHRA) consensus document on management of arrhythmias and cardiac electronic devices in the critically ill and post-surgery patient, endorsed by Heart Rhythm Society (HRS), Asia Pacific Heart Rhythm Society (APHRS), Cardiac Arrhythmia Society of Southern Africa (CASSA), and Latin American Heart Rhythm Society (LAHRS). Europace. 2019;21(1):7-8. doi: 10.1093/europace/euy110.

6. Bosch NA, Cimini J, Walkey AJ. Atrial Fibrillation in the ICU. Chest. 2018;154(6):1424-34. doi: 10.1016/j.chest.2018.03.040.

7. Bosch NA, Cohen DM, Walkey AJ. Risk Factors for New-Onset Atrial Fibrillation in Patients With Sepsis: A Systematic Review and Meta-Analysis. Crit Care Med. 2019;47(2):280-7. doi:10.1097/CCM.0000000000003560.

8. Hindricks G, Potpara T, Dagres N, Arbelo E, Bax JJ, Blomström-Lundqvist C, et al. 2020 ESC Guidelines for the diagnosis and management of atrial fibrillation developed in collaboration with the European Association for Cardio-Thoracic Surgery (EACTS): The Task Force for the diagnosis and management of atrial fibrillation of the European Society of Cardiology (ESC) Developed with the special contribution of the European Heart Rhythm Association (EHRA) of the ESC. Eur Heart J. 2021;42(5):373-498. doi: 10.1093/eurheartj/ehaa612. Erratum in: Eur Heart J. 2021;42(5):507. doi: 10.1093/eurheartj/ehaa798. Erratum in: Eur Heart J. 2021;42(5):546-7. doi: 10.1093/eurheartj/ehaa945. Erratum in: Eur Heart J. 2021;42(40):4194. doi: 10.1093/eurheartj/ehab648.

9. Dabrowski W, Siwicka-Gieroba D, Piasek E, Schlegel TT, Jaroszynski A. Successful Combination of Landiolol and Levosimendan in Patients with Decompensated Heart Failure. Int Heart J. 2020;61(2):384-9. doi: 10.1536/ihj.19-420.

10. Iwahashi N, Kirigaya J, Abe T, Horii M, Takahashi H, Hanajima Y, et al. Clinical usefulness of left ventricular outflow tract velocity time integral for heart failure with reduced ejection fraction with rapid atrial fibrillation during landiolol treatment. J Cardiol. 2022;79(1):21-9. doi: 10.1016/j.jjcc.2021.09.008.

11. Guarracino F, Bertini P, Pinsky MR. Management of cardiovascular insufficiency in ICU: the BEAT approach. Minerva Anestesiol. 2021;87(4):476-80. doi: 10.23736/S0375-9393.20.14613-3.

12. Fuchs C, Wauschkuhn S, Scheer C, Vollmer M, Meissner K, Kuhn SO, et al. Continuing chronic beta-blockade in the acute phase of severe sepsis and septic shock is associated with decreased mortality rates up to 90 days. Br J Anaesth. 2017;119(4):616-25. doi: 10.1093/bja/aex231.

13. Arrigo M, Jaeger N, Seifert B, Spahn DR, Bettex D, Rudiger A. Disappointing Success of Electrical Cardioversion for New-Onset Atrial Fibrillation in Cardiosurgical ICU Patients. Crit Care Med. 2015;43(11):2354-9. doi: 10.1097/CCM.0000000000001257.

14. Arrigo M, Mebazaa A, Bettex D, Rudiger A. Hemodynamic response of restoring sinus rhythm in critically ill patients with atrial fibrillation. Am J Emerg Med. 2020;38(6):1192-4. doi: 10.1016/j.ajem.2020.02.027.

15. Van Gelder IC, Rienstra M, Bunting KV, Casado-Arroyo R, Caso V, Crijns H, et al. 2024 ESC Guidelines for the management of atrial fibrillation developed in collaboration with the European Association for Cardio-Thoracic Surgery (EACTS). Eur Heart J. 2024;45(36):3314-414. doi: 10.1093/eurheartj/ehae176.

16. Wetterslev M, Haase N, Hassager C, Belley-Cote EP, McIntyre WF, An Y, et al. New-onset atrial fibrillation in adult critically ill patients: a scoping review. Intensive Care Med. 2019;45(7):928-38. doi: 10.1007/s00134 019-05633-x.

17. Dan GA, Dan AR, Ivanescu A, Buzea AC. Acute rate control in atrial fibrillation: an urgent need for the clinician. Eur Heart J Suppl 2022;24 Suppl D:D3-D10. doi: 10.1093/eurheartjsupp/suac022.

18. Dan GA. Foreword: Acute optimization of heart rate in atrial fibrillation: landiolol as a first line therapy. Eur Heart J Suppl 2022;24 Suppl D:D1-D2. doi: 10.1093/eurheartjsupp/suac028.

19. Ditali V, Garatti L, Morici N, Villanova L, Colombo C, Oliva F, et al. Effect of landiolol in patients with tachyarrhythmias and acute decompensated heart failure (ADHF): a case series. ESC Heart Fail. 2022;9(1):766-70. doi: 10.1002/ehf2.13763.

20. Shibata SC, Uchiyama A, Ohta N, Fujino Y. Efficacy and Safety of Landiolol Compared to Amiodarone for the Management of Postoperative Atrial Fibrillation in Intensive Care Patients. J Cardiothorac Vasc Anesth. 2016;30(2):418-22. doi: 10.1053/j.jvca.2015.09.007.

21. Brown SM, Beesley SJ, Lanspa MJ, Grissom CK, Wilson EL, Parikh SM, et al. Esmolol infusion in patients with septic shock and tachycardia: a prospective, single-arm, feasibility study. Pilot Feasibility Stud. 2018;4:132. doi:10.1186/s40814-018-0321-5.

22. Cocchi MN, Dargin J, Chase M, Patel PV, Grossestreuer A, Balaji L, et al. Esmolol to Treat the Hemodynamic Effects of Septic Shock: A Randomized Controlled Trial. Shock. 2022;57(4):508-17. doi: 10.1097/SHK.0000000000001905.

23. Levy B, Fritz C, Piona C, Duarte K, Morelli A, Guerci P, et al. Hemodynamic and anti-inflammatory effects of early esmolol use in hyperkinetic septic shock: a pilot study. Crit Care. 2021;25(1):21. doi: 10.1186/s13054-020-03445-w.

24. Guarracino F, Cortegiani A, Antonelli M, Behr A, Biancofiore G, Del Gaudio A, et al. The role of beta-blocker drugs in critically ill patients: a SIAARTI expert consensus statement. J Anesth Analg Crit Care. 2023;3(1):41. doi: 10.1186/s44158-023-00126-2.

25. O'Brien B, Burrage PS, Ngai JY, Prutkin JM, Huang CC, Xu X, et al. Society of Cardiovascular Anesthesiologists/European Association of Cardiothoracic Anaesthetists Practice Advisory for the Management of Perioperative Atrial Fibrillation in Patients Undergoing Cardiac Surgery. J Cardiothorac Vasc Anesth. 2019;33(1):12-26. doi: 10.1053/j.jvca.2018.09.039.

26. Kakihana Y, Nishida O, Taniguchi T, Okajima M, Morimatsu H, Ogura H, et al. Efficacy and safety of landiolol, an ultra-short-acting β1-selective antagonist, for treatment of sepsis-related tachyarrhythmia (J-Land 3S): a multicentre, open-label, randomised controlled trial. The Lancet Respiratory Medicine. 2020;8(9):863-72. doi: 10.1016/S2213-2600(20)30037-0.

27. Okajima M, Takamura M, Taniguchi T. Landiolol, an ultra-short-acting β1-blocker, is useful for managing supraventricular tachyarrhythmias in sepsis. World J Crit Care Med. 2015;4(3):251-7. doi: 10.5492/wjccm.v4.i3.251.

28. Matsuda N, Nishida O, Taniguchi T, Okajima M, Morimatsu H, Ogura H, et al. Impact of patient characteristics on the efficacy and safety of landiolol in patients with sepsis-related tachyarrhythmia: Subanalysis of the J-Land 3S randomised controlled study. EClinicalMedicine. 2020;28:100571. doi:10.1016/j.eclinm.2020.100571.

29. Rehberg S, Frank S, Černý V, Cihlar R, Borgstedt R, Biancofiore G, et al. Landiolol for heart rate control in patients with septic shock and persistent tachycardia. A multicenter randomized clinical trial (Landi-SEP). Intensive Care Med. 2024;50(10):1622-34. doi:10.1007/s00134-024-07587-1.

30. Iwahashi N, Takahashi H, Abe T, Okada K, Akiyama E, Matsuzawa Y, et al. Urgent Control of Rapid Atrial Fibrillation by Landiolol in Patients With Acute Decompensated Heart Failure With Severely Reduced Ejection Fraction. Circulation Reports. 2019;1(10):422-30. doi: 10.1253/circrep.CR-19-0076.

31. Kinugawa K, Nagai R, Inoue H, Atarashi H, Seino Y, Yamashita T, et al. Impacts of patient characteristics on the effectiveness of landiolol in AF/AFL patients complicated with LV dysfunction: Subgroup analysis of the J-Land study. Adv Ther. 2014;31(4):426-39. doi: 10.1007/s12325-014-0111-2.

32. Nagai R, Kinugawa K, Inoue H, Atarashi H, Seino Y, Yamashita T, et al. Urgent management of rapid heart rate in patients with atrial fibrillation/flutter and left ventricular dysfunction: comparison of the ultra-short-acting β1-selective blocker landiolol with digoxin (J-Land Study). Circ J. 2013;77(4):908-16. doi: 10.1253/circj.cj-12-1618.

33. Shinohara M, Wada R, Yano K, Akitsu K, Koike H, Kinoshita T, et al. Comparison of Landiolol and Digoxin as an Intravenous Drug for Controlling the Heart Rate in Patients with Atrial Fibrillation and Severely Depressed Left Ventricular Function. Int Heart J. 2020;61(5):944-50. doi: 10.1536/ihj.20-256.

34. Yamashita T, Nakasu Y, Mizutani H, Sumitani K. A prospective observational survey on landiolol in atrial fibrillation/atrial flutter patients with chronic heart failure - AF-CHF landiolol survey. J Cardiol. 2019;74(5):418-25. doi: 10.1016/j.jjcc.2019.05.012.

35. Yamashita T, Nakasu Y, Mizutani H, Sumitani K. Mid-Term Prognosis After Landiolol Treatment in Atrial Fibrillation/Atrial Flutter Patients With Chronic Heart Failure - A Prospective Observational Survey (AF-CHF Landiolol Survey). Circ Rep. 2020;3(1):34-43. doi: 10.1253/circrep.CR-20-0119.

36. N Naidu SS, Baran DA, Jentzer JC, Hollenberg SM, van Diepen S, Basir MB, et al. SCAI SHOCK Stage Classification Expert Consensus Update: A Review and Incorporation of Validation Studies: This statement was endorsed by the American College of Cardiology (ACC), American College of Emergency Physicians (ACEP), American Heart Association (AHA), European Society of Cardiology (ESC) Association for Acute Cardiovascular Care (ACVC), International Society for Heart and Lung Transplantation (ISHLT), Society of Critical Care Medicine (SCCM), and Society of Thoracic Surgeons (STS) in December 2021. J Am Coll Cardiol. 2022;79(9):933-46. doi: 10.1016/j.jacc.2022.01.018.

37. Schurtz G, Mewton N, Lemesle G, Delmas C, Levy B, Puymirat E, et al. Beta-blocker management in patients admitted for acute heart failure and reduced ejection fraction: a review and expert consensus opinion. Front Cardiovasc Med. 2023;10:1263482. doi: 10.3389/fcvm.2023.1263482.

38. Guarracino F, Bertini P, Pinsky MR. Management of cardiovascular insufficiency in ICU: the BEAT approach. Minerva Anestesiol. 2021;87(4):476-80. doi: 10.23736/S0375-9393.20.14613-3.

39. Levy B, Slama M, Lakbar I, Maizel J, Kato H, Leone M, et al. Landiolol for Treatment of New-Onset Atrial Fibrillation in Critical Care: A Systematic Review. J Clin Med. 2024;13(10):2951. doi: 10.3390/jcm13102951.

40. Böhm M, Link A, Cai D, Nieminen MS, Filippatos GS, Salem R, et al. Beneficial association of β-blocker therapy on recovery from severe acute heart failure treatment: data from the Survival of Patients With Acute Heart Failure in Need of Intravenous Inotropic Support trial. Crit Care Med. 2011;39(5):940-4. doi: 10.1097/CCM.0b013e31820a91ed.

41. Noveanu M, Breidthardt T, Reichlin T, Gayat E, Potocki M, Pargger H, et al. Effect of oral β-blocker on short and long-term mortality in patients with acute respiratory failure: results from the BASEL-II-ICU study. Crit Care. 2010;14(6):R198. doi: 10.1186/cc9317.

42. Kobayashi S, Susa T, Ishiguchi H, Myoren T, Murakami W, Kato T, et al. A low-dose β1-blocker in combination with milrinone improves intracellular Ca2+ handling in failing cardiomyocytes by inhibition of milrinone-induced diastolic Ca2+ leakage from the sarcoplasmic reticulum. PLoS One. 2015;10(1):e0114314. doi: 10.1371/journal.pone.0114314.

43. Kobayashi S, Susa T, Tanaka T, Murakami W, Fukuta S, Okuda S, et al. Low-dose β blocker in combination with milrinone safely improves cardiac function and eliminates pulsus alternans in patients with acute decompensated heart failure. Circ J. 2012;76(7):1646-53. doi: 10.1253/circj.cj-12-0033.

44. Hifumi T, Kato H, Koido Y, Kawakita K, Kuroda Y. Safety and effective use of landiolol in the ICU. J Intensive Care. 2014;2(1):16. doi: 10.1186/2052-0492-2-16.

45. Schortgen F, Clabault K, Katsahian S, Devaquet J, Mercat A, Deye N, et al. Fever control using external cooling in septic shock: a randomized controlled trial. Am J Respir Crit Care Med. 2012;185(10):1088-95. doi: 10.1164/rccm.201110-1820OC.
