# Supplementary material
Source: Research Square preprint supplement (doi:10.21203/rs.3.rs-9269792/v1)
Supplement: Supplementary file 3 [file 3f8723334bbcd480a6a4716b.docx]

# **Supplementary Table 2.** List of members of Scientific and Editorial Boards.

| **Title** | **Surname** | **Name** | **City** | **Country** |
| --- | --- | --- | --- | --- |
| **Scientific Board** | | | | |
| Prof. Dr. | Balik | Martin | Prague | Czechia |
| Prof. Dr. | Fries | Michael | Limburg | Germany |
| Prof. Dr. | Guarracino | Fabio | Pisa | Italy |
| Prof. Dr. | Joannidis | Michael | Innsbruck | Austria |
| Prof. Dr. | Levy | Bruno | Nancy | France |
| Prof. Dr. | Makris | Demosthenes | Larissa | Greece |
| Prof. Dr. | Rehberg | Sebastian | Bielefeld | Germany |
| Prof. Dr. | Slama | Michel | Amiens | France |
| Prof. | Singer | Mervyn | London | United Kingdom |
| **Editorial Board** | | | | |
| Prof. Dr. | Guarracino | Fabio | Pisa | Italy |
| Prof. Dr. | Slama | Michel | Amiens | France |
| **Methodologist** | | | | |
| Dr. | Urbani | Alessandro | Venice | Italy |
