# Supplementary material
Source: Research Square preprint supplement (doi:10.21203/rs.3.rs-9269792/v1)
Supplement: Supplementary file 4 [file ce572a19ede12f30f83919ad.docx]

# **Supplementary Table 1.** Pharmacokinetics and pharmacodynamic characteristics of landiolol, esmolol and metoprolol.

|  | **Landiolol** | **Esmolol** | **Metoprolol** |
| --- | --- | --- | --- |
| Cardio-selectivity (β1/β2) | 250 | 30 | 3 |
| Onset of action (minutes) | 1 | 2 | 1-3 |
| Metabolism | Plasma pseudocholinesterases | Red blood cell esterases | Hepatic cytochrome P2D6 (CYP2D6) |
| Elimination - half-life(minutes) | 4 min | 9 min | 420 min |
| Ref: Guarracino F, Cortegiani A, Antonelli M, Behr A, Biancofiore G, Del Gaudio A, et al. The role of beta-blocker drugs in critically ill patients: a SIAARTI expert consensus statement. J Anesth Analg Crit Care. 2023;3(1):41. doi: 10.1186/s44158-023-00126-2. | | | |
